# Supplementary material for: Genome diversity of domesticated Acinetobacter baumannii ATCC 19606T strains
Source: PubMed Central journal article supplement — Microb Genom. 2022 Jan 27;8(1):000749. doi: 10.1099/mgen.0.000749 (PMC8914354; doi:10.1099/mgen.0.000749), 2022-01-27
Supplement: mgen-8-0749-s001.pdf [file mgen-8-0749-s001.pdf]

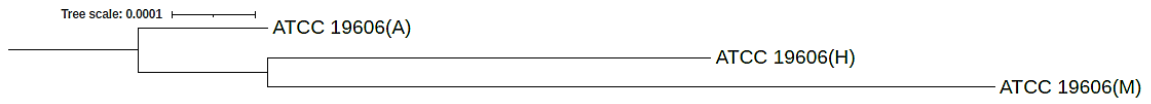

**Figure S1.** Phylogenetic tree based on the concatenated alignment of 22 genes showing SNPs and INDELS in pairwise comparisons between *A. baumannii* ATCC 19606(A), ATCC 19606(M), and ATCC 19606(H) genomes. The tree was generated by the NJ method and rooted on ATCC 19606(A).

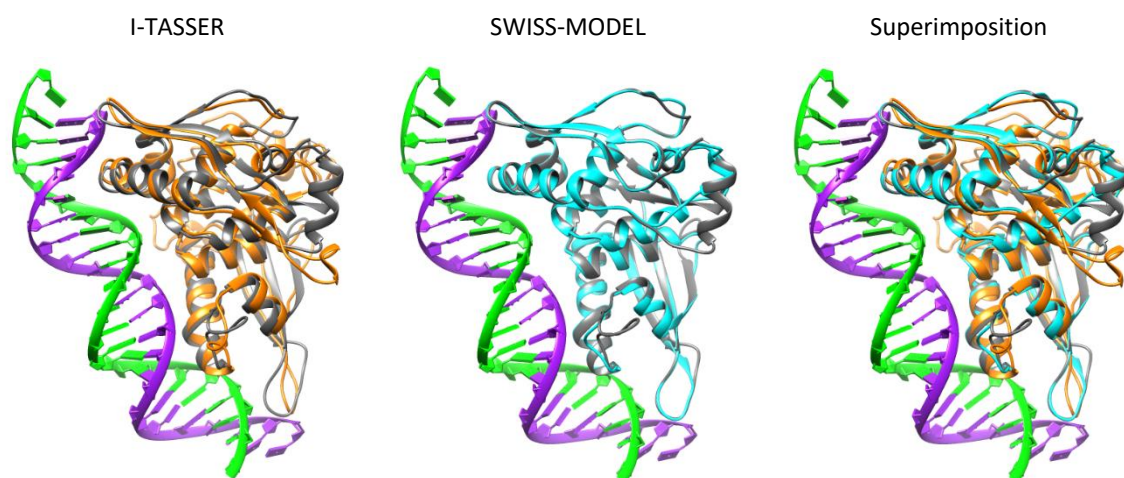

| Predicted protein        | I-TASSER template<br>(PDB ID; reference)                                | TM-score <sup>a</sup> | SWISS-MODEL template<br>(PDB ID; reference)                             | Q-MEAN <sup>b</sup> |
|--------------------------|-------------------------------------------------------------------------|-----------------------|-------------------------------------------------------------------------|---------------------|
| p1ATCC19606<br>replicase | $\pi$ initiator protein–iteron<br>complex of plasmid R6K<br>(2NRA; [6]) | 0.669                 | $\pi$ initiator protein–iteron<br>complex of plasmid R6K<br>(2NRA; [6]) | -2.81               |

<sup>a</sup> TM-score is a measure of global structural similarity between query and template protein; the value is comprised between 0 (lowest similarity) and 1 (highest similarity);

<sup>b</sup> The global and per-residue model quality has been assessed using the QMEAN scoring function [5].

**Figure S2.** Homology modelling of p1ATCC19606 replicase. Superimposition of the p1ATCC19606 replicase and *E. coli* Pi initiator protein crystal structure (grey; 2NRA) interacting with 22-mer iteron of DNA. The query structure is shown in grey, while the p1ATCC19606 structural analog is displayed in orange or cyan for I-TASSER and SWISS-MODEL models, respectively. Only the first-ranked model predicted by I-TASSER and SWISS-MODEL for each query is shown, and the relative scores are indicated in the table. The image was generated using UCSF Chimera software (available at <http://www.cgl.ucsf.edu/chimera>).

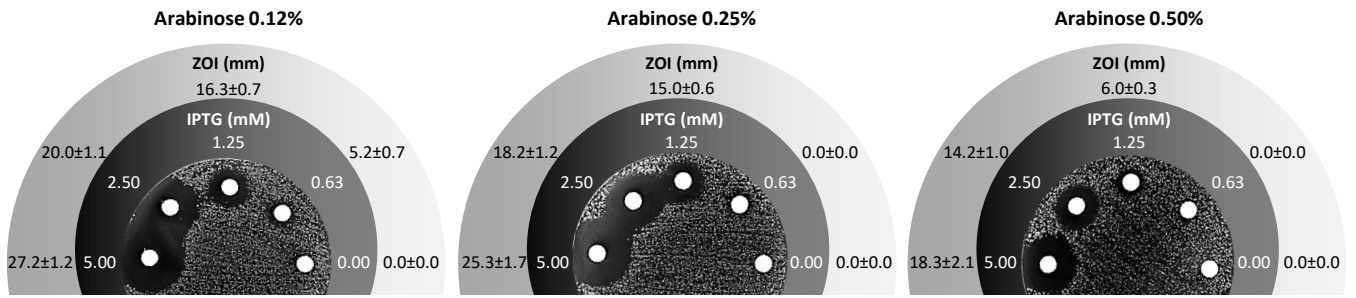

**Figure S3.** Modulation of *higB2*-like and *higA2*-like expression and its effect on bacterial growth. *E. coli* DH5 $\alpha$  carrying both the pVRL2*higA2* and pME6032*higB2* plasmids were spread onto LA plates supplemented with Tc 10  $\mu$ g/ml and the indicated arabinose concentrations, then challenged with disks containing different IPTG concentrations. IPTG concentrations are shown in the intermediate black ring in clockwise direction from 5 mM to 0 mM. The outermost grey ring displays the ZOI expressed in mm (values are the mean  $\pm$  SD of three independent experiments).
